# Supplementary material
Source: PubMed Central journal article supplement (PMC7108202)
Supplement: reddy_identification_of_pathogens.pdf [file reddy_identification_of_pathogens.pdf]

## Review

# Identification of Pathogens by Mass Spectrometry

Yen-Peng Ho<sup>1,a</sup> and P. Muralidhar Reddy<sup>1</sup>

<sup>1</sup> Department of Chemistry, National Dong Hwa University, Hualien, Taiwan.

<sup>a</sup>Address correspondence to this author at : Department of Chemistry, National Dong Hwa University, Hualien 97401, Taiwan. Fax : 886-3-8633570 ; e-mail [ypho@mail.ndhu.edu.tw](mailto:ypho@mail.ndhu.edu.tw).

Clin Chem 2010 ; 56 : 525-536

## 質量分析による病原体の同定

### 概 要

背景：質量分析法(MS)は、微生物の同定および特性の評価に適した技術である。

内容：このレビューでは、現在、病原体の分析に用いられる、MS 技術をベースとした手法について要約する。MS を用い、サンプル分画を行わずに病原性微生物細胞を丸ごと、直接的に分析することで、病原体分類のためのバイオマーカーを評価できるとともに、迅速かつハイスループット分析能を得ることが可能となる。また、クロマトグラフィーやアフィニティー（親和性）に基づく様々な技術と MS を組み合わせることで、複雑だった微生物同定のためのバイオマーカーを単純化し、より正確な結果を導くことが可能となる。試料液中における標的微生物の濃縮には、ナノテクノロジーの利用を含むアフィニティー技術を用いることができ、結果として検出限界の改善が見込まれる。また、病原体の核酸増幅と MS をベースとした分析法を組み合わせるアプローチも、バイオマーカー分析の一方法である。一方で、多変量解析とバイオインフォマティクスのアプローチを含む多くのデータ分析法も、微生物の同定用に開発されつつある。このレビューでは、感染性微生物の同定と分類目的とした MS の臨床応用と、今後の展望について紹介する。

要約：分離および質量分析における装置、イオン化技術、および生物学的手法の進歩により、病原体の分析を目的とした MS の分析能力の向上が見込まれる。

## 序 文

迅速で信頼性があり、しかも簡便な微生物の同定が、環境微生物学および臨床微生物学の主なるゴールであるが、多様性と複雑さは、常に生体試料の分析にとっての難問である (1)。これまで用いられてきた古典的手法により微生物を正確に同定するには、多大な時間が必要で、しかも煩雑な操作を要する。微生物の同定と特性評価をより迅速に行うことができれば、健康被害を最小化し、さらに微生物によってもたらされる疾病の蔓延を、防ぐことが可能となる。微生物の同定および特性の評価に適した近代的方法の必要条件として、ロバストネス（堅牢性）、簡便性、低コスト、迅速性、ハイスループット（高処理）能力を挙げることができる。これらのうちほとんどの必要条件を満たすため、今、質量分析法（MS）<sup>1</sup>が微生物の同定技術として注目されている (1)。

図1に微生物同定を目的とした微生物の濃縮および分析手法のフローチャートを示す。一般的に、MSをベースとした分析では、事前に培養もしくは培養を伴わない手法により十分量の微生物細胞の回収を行う。多くの場合、培養を伴わない手法として、標的細胞との生化学的、化学的、あるいは物理学的な相互作用に基づく、アフィニティー技術が用いられている。そしてその微生物細胞の回収画分について、MS分析が行われる。エアゾル化された個々の微生物粒子をリアルタイムに分析するためには、バイオエアゾル質量分析などの直接的なサンプリング技術が開発されている。また、高度の増幅能力を有する核酸増幅法に、高解像に質量を分析可能なMSを組み合わせた分析手法も開発されている。バイオマーカーとなり得る分子を網羅的に調べるためには、MSによる分析以前に、微生物細胞からバイオマーカーを抽出したうえで、バイオマーカーの分画がなされる。一方で、フローチャート中の直接的な分析とは、バイオマーカーの抽出および分画を行わずに、微生物細胞を直接的に分析することを意味している。

生体分子の相互作用を理解し操作して、分子標的を認識し、診断を行なうために、生体分子を結合させたナノ粒子が用いられている。さらに、MSをベースとした微生物の同定には、ナノ粒子が重要な役割を果たしている (2)(3)。機能的な磁性ナノ粒子の使用により、極めて微量なバクテリアの検知に要する時間を短縮できるうえ、臨床研究において恩恵を受けることができるのは明らかである。

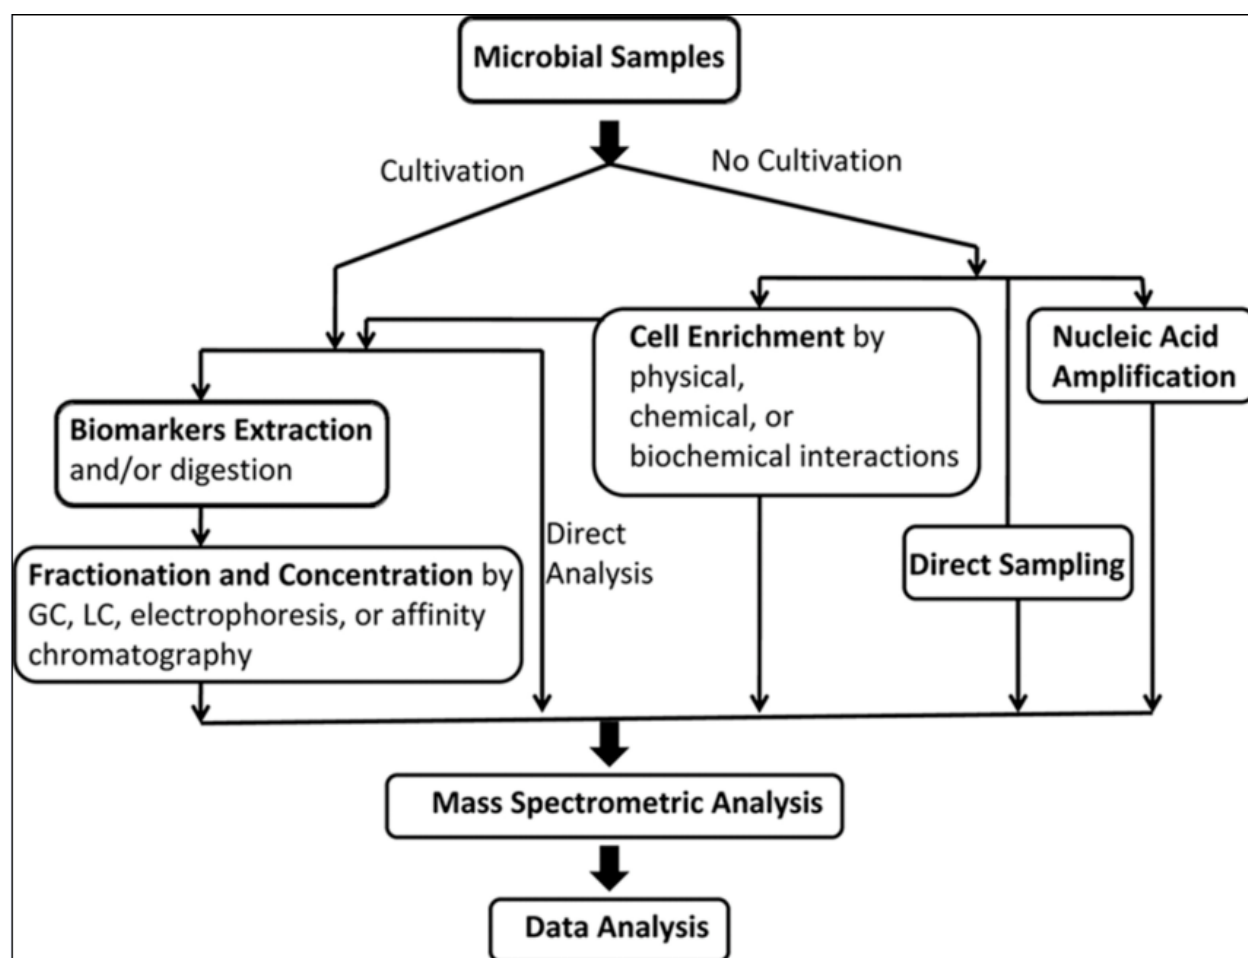

図1 微生物同定のための、微生物に由来する分子の濃縮および分析戦略のフローチャート

いわゆるソフトイオン化技術－MALDI およびエレクトロスプレーイオン化(ESI)－の開発により、中～高分子量の熱不安定性化合物から、気相イオンを発生させることが可能となった。MALDI-MS および ESI-MS 技術を用いた微生物同定法は、医薬・臨床微生物学での従来の検査法に代わる優れた手法である。近年、脱離エレクトロスプレーイオン化のような高度な技術が、バクテリアの同定に応用されつつある。MALDI、ESI、およびバイオエアゾル質量分析計を用いたバクテリアの直接的な同定には、簡便性や迅速性などのアドバンテージがある。

検体の前処理は、微生物の分析にとって重要課題である。注意深い検体前処理は、十分な検知能と選択性を達成するためには必須であるが、高ハイスループットを確保するためには、検体の前処理に要する時間は最小限に抑えられなければならない。微生物のバイオマーカーの複雑さは、様々なクロマトグラフィーをベースにした手法によって、より単純化し得る。このレビューでは、MS をベースとする様々なクラスの生体分子の分析や、ガスクロマトグラフィー(GC)、キャピラリー電気

泳動、液体クロマトグラフィー(LC)、および SELDI のような、アフィニティー法を含むクロマトグラフ技術により、可能となった各クラスの分析手法について論じている。

微生物同定を目的とした MS による分析アプローチは、微生物のゲノムの一次配列多様性に伴う、PCR 産物の分子量の違いを測定するうえで、好都合かもしれない。PCR 法は特異性を持ち、迅速で、分析感度が高いが、特に未知の微生物の分類（クラシフィケーション）を、直接行うことはできない。PCR と MS を組み合わせる方法は、それぞれの強みを活かすことができるとともに、場合によってはそれぞれの単独技術では得られなかった、追加情報を入手することができる (4)。このレビューでは、病原体識別を目的としたライブラリーの検索および統計学的アプローチを含むデータ分析法についても要約しており、微生物の分析手法の臨床応用例や、今後の展望についても述べる。

### 細胞を濃縮するためのアフィニティーベースの技術

一般に、生体液中に共存するタンパク質あるいは代謝産物により、MS によって得られる微生物細胞由来のバイオマーカーのシグナル強度は、抑制されてしまう。従って、ターゲットとするバクテリアに特異的なアフィニティープローブを開発することで、生体液中の共雑物による干渉を有効的に最小化し、さらに注目する微生物を濃縮することも可能である。Afonso と Fenselau (5) は、アフィニティー技術と MALDI-MS を組み合わせることで、複雑な生体の混合物からのバクテリアの同定について報告している；彼らは複雑な生体混合物からバクテリア細胞の形跡を捕捉するために、ーレクチン固定化基質を用いてアフィニティー技術を利用した。

免疫磁気分離法は、抗体をコーティングした磁性粒子を用い、臨床検体や食物、環境試料から病原性微生物や生物活性のある細胞を分離する、一般的な手法である。Madonna ら (6) は免疫磁気分離法と MALDI-MS を組み合わせ、複雑な生体液中からターゲットとするバクテリアを同定する迅速法を開発した。この方法ではマイクロ・リットルレベルの試料を必要とするのみである；例えば、生理バッファーに存在する 1 mL 辺り最低で  $1.0 \times 10^7$  個の濃度のバクテリアが、一時間以内に検知可能である。さらに、体積辺りの表面積が大きいこと、試料中に含まれる測定物質の分離用プローブとして、ナノ粒子(NP)が注目されている。NP とターゲット間の共有結合は、NP 表面上でのチオール化分子の自己集合化によって、速やかに形成される。Lin ら (7) は、マンノースカプセル化金ナノ粒子をナノレベルのプローブとして用いることで、大腸菌の I 型繊毛の認識に成功した。Gu ら (2)(8) は、バンコマイシンで修飾した Fe-Pt ナノ粒子 (生理活性を持つ磁性ナノ粒子) が、バンコマイシン耐性バクテリアを捕らえるための、アフィニティープローブに利用できることを示唆した；彼らは、約  $10^1$  コロニー形成単位(CFU)/mL の濃度の病原体を 1 時間以内に捕らえるため、S-Pt 結合を用いた (2)。

同様の研究で Chen ら (9) は、バンコマイシン結合磁性 NP を用いることで、バクテリアが  $7 \times 10^4$  CFU/mL 混在する尿サンプル(3 mL)から、ブドウ球菌および黄色ブドウ球菌を選択的にトラップすることができた。これらのアフィニティー法のほとんどは、サンプル分析には MALDI-MS を用いているが、原理的には LC-ESI-MS を用いることも可能である。一方 Liu ら(3)は、ハト・アルブミン(POA)結合型の  $\text{Fe}_3\text{O}_4@\text{Al}_2\text{O}_3$  磁性 NP により、尿路疾患性の大腸菌を捕捉した。図 2 に、そのプロセスを示した。POA 結合型磁性粒子に、*S.saprophyticus* および大腸菌 J96 を加えた結果、大腸菌 J96 が選択的に磁性粒子にトラップされ、磁力粒子を回収することで大腸菌 J96 を捕捉した。その後、NP に結合したバクテリアを、直接的に MS 分析した。

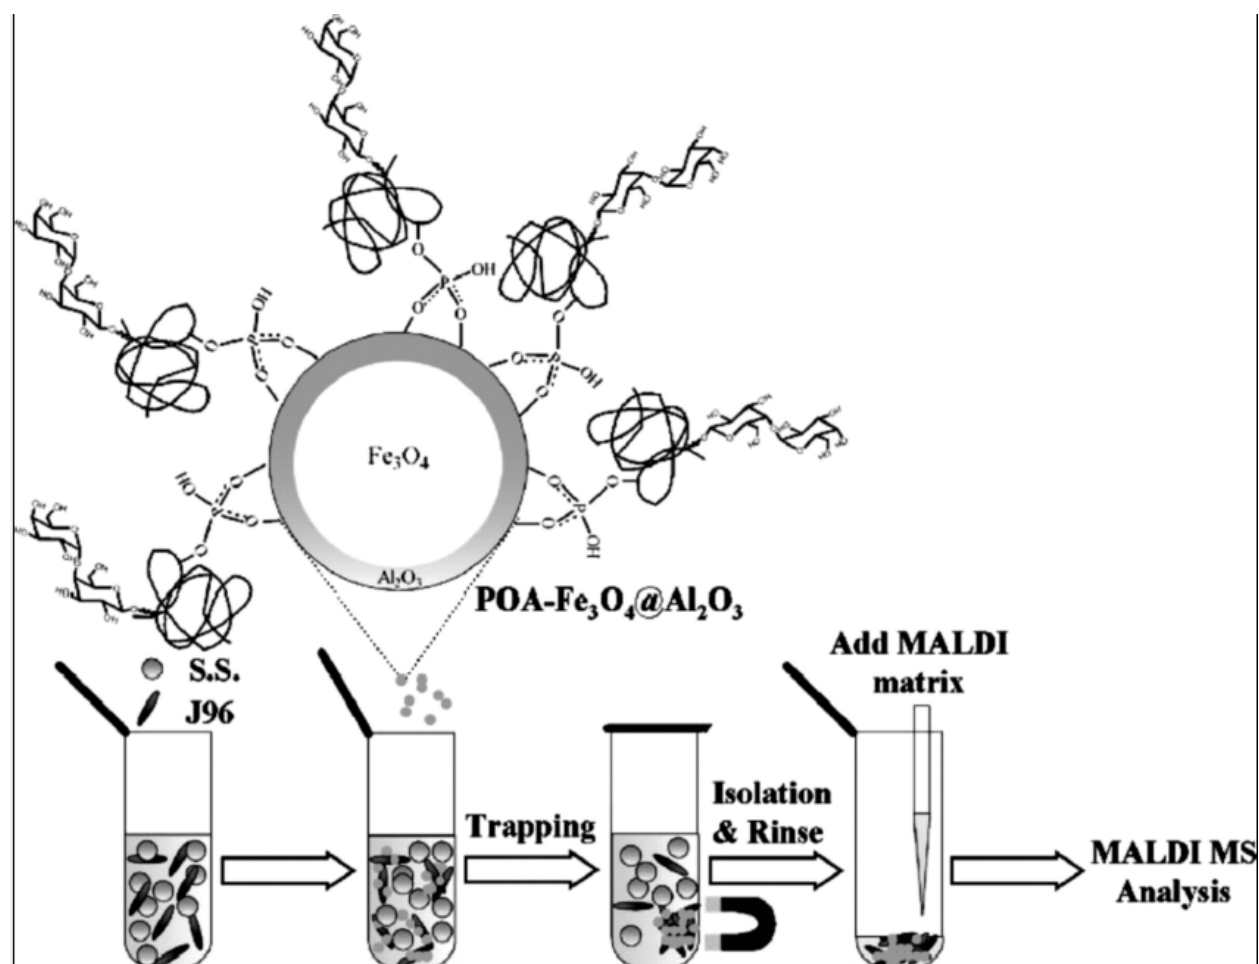

図 2 POA 結合型  $\text{Fe}_3\text{O}_4@\text{Al}_2\text{O}_3$  磁性ナノ粒子を用いて、標的バクテリアをトラップするプロセス

単離の 1 時間前に、ナノ粒子をバクテリアのサンプルとボルテックスにより混合した。単離したバクテリア結合粒子はシナピン酸と混合した後、MALDI 分析を行った。S.S.(*S.saprophyticus*)。再版は Liu らからの承諾済み。3c 2009 (American Chemical Society が版權を有する)。

#### MS をベースとした微生物の直接的な分析

## MALDI-MS

MALDI-MS を用いた微生物の直接的な分析法は、迅速性、低い検出限界、質量スペクトルの単純化、および共雑物を含んだ状態でも分析できることなど、数々のアドバンテージを持っている。細胞に含まれる蛋白質の網羅的なプロファイリングによる MALDI-MS のスペクトルは、分類学的に見て個々に特徴があることから、全蛋白質の一部分しか検出されないものの、genus、種、株レベルでバクテリアを分類することが可能である。種および亜種を特定するために、これまでに多くの臨床微生物検査室が MALDI-TOF MS を使い、インタクトな細胞のままで、直接的にバクテリアを分析する手法を試みてきた(10)。図 3 は、*S. aureus*、*Enterococcus faecalis*、*E. coli*、*Vibrio parahaemolyticus* の、4 種類の純粋培養それぞれからのインタクトな細胞を、直接的に MALDI で分析したスペクトルである。MALDI-MS による微生物の同定およびタイピングについては、いくつかの文献があるため(1)(11-14)、ここで言及しない。

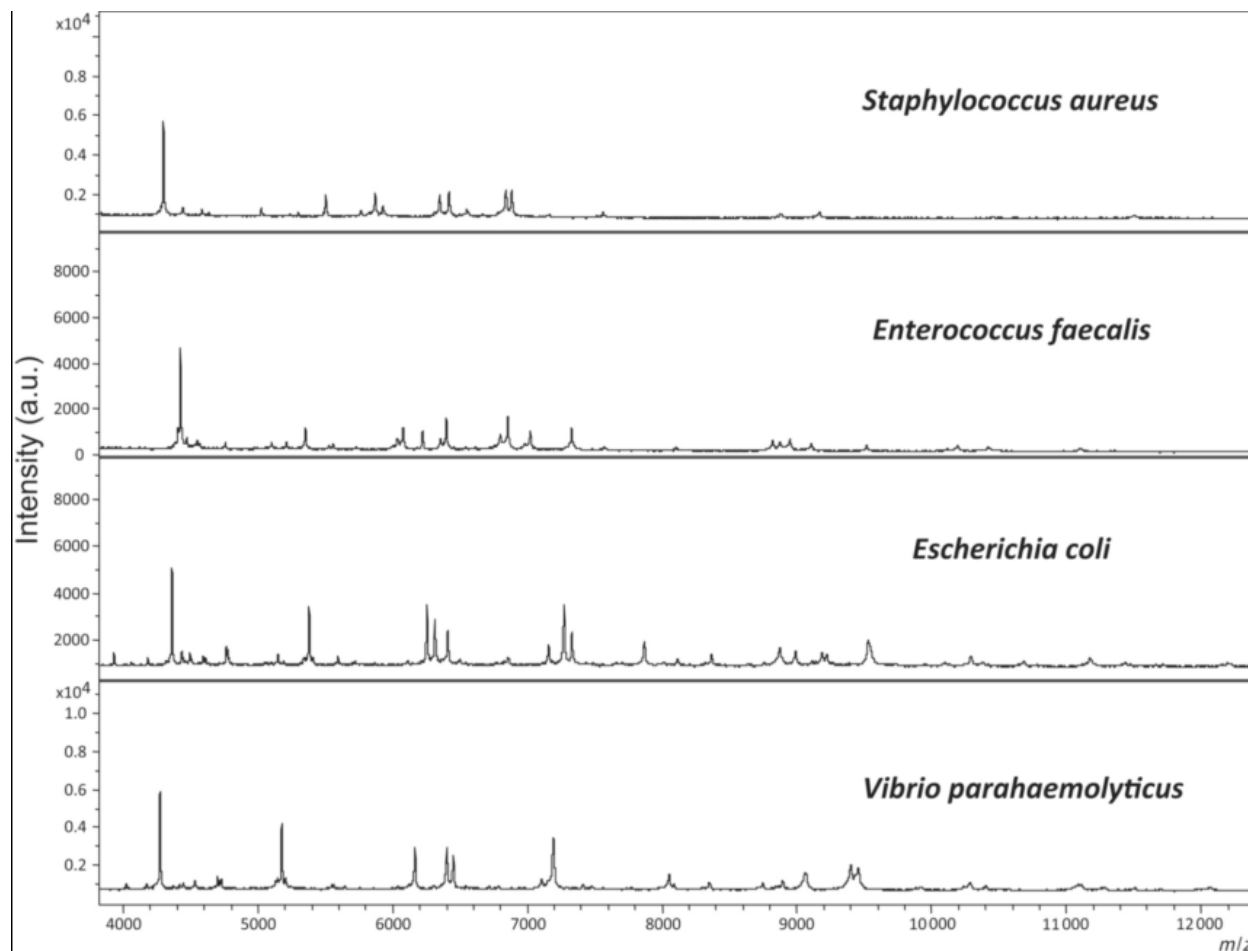

図3 MALDI スペクトルは、黄色ブドウ球菌、*E.faecalis*、大腸菌および *V.parahaemolyticus* のインタクトな細胞を、直接的に分析した MALDI スペクトルの結果。

スペクトルは time-of-flight 質量分析計を用いて、線形モードで分析した結果である。サンプルはそれぞれ  $10^7$  CFU バクテリアを含む。

#### ESI-MS

直接的な分析による微生物の同定に、ESI-MS はそれほど利用されていないが、Xiang ら (15) はグローバル ESI-タンデム MS (MS/MS) を用い、細胞溶解物の分析による微生物のキャラクタリゼーションを試みている。また、Vaidyanathan ら (16) は ESI-MS を用いて、全バクテリア細胞を直接的に分析している。さらに、新たに開発された脱離エレクトロスプレーイオン化 (DESI) MS 技術により、凝縮相サンプルの直接的な分析も可能である。この手法は、得られる DESI 質量スペクトルをもとに、*E. coli*、*S. aureus*、*Enterococcus* sp.、*Bordetella bronchiseptica*、*Bacillus thuringiensis*、*Bacillus subtilis*、および *Salmonella typhimurium* の識別に用いられた。質量 50~500 Da の範囲で、識別可能な DESI 質量スペクトルは、陽イオンおよび陰イオンモードの両方を用い、バクテリア全体の分析から得られている；分析時間は 2 分未満になり得る (17)。

#### バイオエアゾル質量分析

バイオエアゾル質量分析 (BAMS) は、リアルタイムにエアロゾル化された微生物粒子を個々に分析し、同定するために開発されてきた (14)。BAMS により、分析前の濃縮を伴わずに、細胞単体レベルで種の違いを瞬間的に検知する潜在能力を備えている；BAMS による検知は特異性が非常に高く、かつミリ秒という、短い時間で分析が可能である。この手法は、*Bacillus* spore species *B. thuringiensis* と *B. atrophaceus* の識別や (18)、*Mycobacterium tuberculosis* の検知 (19) に適用された。*Bacillus* の孢子と栄養細胞の BAMS のスペクトル分析には試薬を使用しないため、質量  $m/z$  300 未満の分子から得られたシグナルの分析に限定される。BAMS は種レベルでの識別にある程度成功しているが、質量の大きい分子の分析では感度が低いという課題もある (18)。高質量領域での感度が改善されることで、種レベルの識別を可能とする、よりロバスト（堅牢）なバイオマーカー分析系の構築が可能となるであろう。

空気感染性病原体の高質量分析については、MALDI とエアゾルタイム・オブ・フライト（飛行時間）MS の組み合わせにより、改善できる可能性がある (20)。この方法では、まず病原体のエアゾルにマトリックス蒸気を混合した後に冷却チャンバーに送り、エアゾルをマトリックスで包み込む。その後マトリックス・エアゾル粒子を、飛行タイム・オブ・フライト MS で分析するものである。Van Wuijckhuijse ら (20) は、単一エアゾル粒子に含まれるタンパク質とその他の生体物質を分析するための、オンラインシステムを開発した。これにより、20,000 Da までのタンパク質エアゾル粒子の分析が、可能になっている；この質量範囲は、*Bacillus* spores を含むバクテリアの分析に有用なバイオマーカーの質量に、適合するものである (20)。

#### 質量分析のための検体分画法

## GC-MS および熱分解- GC-MS

GC-MS は、微生物の特性評価を行うための、代謝産物のプロファイリングに用いられてきた(21)。GC-MS によって分析可能な化合物の最大分子量は 1000 Da 未満である。不揮発性物質については、GS-MS 分析前に、誘導化または分解によって揮発性物質に転換することが必要となる。石田ら(22)は、大腸菌 K-12 株細胞全体のリン脂質を直接的に分析する代替手段として、試料をプローブ上で加熱加水分解とメチル化-GC(テトラメチルアンモニウム水酸化物の存在下で)し、MALDI-MS で分析した。この方法では面倒な検体前処理を要しない。

Mas ら(23)は、*Saccharomyces cerevisiae* の異なる変異体から、特異的な代謝産物のプロファイを得るために、GC-MS と直接導入 MS を用いた。LC-MS と GC-MS の組み合わせは、メタボローム（全代謝産物）を広範囲に分析することが可能である(24)。Smilde ら(24)は、コンピューター予測から得られた *B. subtilis* と *E. coli* の代謝産物群のうち、市販されている物質に関して、93%もの高確率で検知可能であることを示した。6つの異なる手法により *B. subtilis*, *E. coli* および *S.cerevisiae* を分析した結果も、同様の検出率(95~97%)が報告されている(25)。これらの3つの微生物のメタボロームには、合計で 905 の異なる代謝産物が存在し、そのうち 410 の代謝産物が3つの微生物それぞれで特異的なものであった。

GC-MS/MS によって、複雑な環境試料・臨床検体中の炭水化物バイオマーカー(例えばムラミン酸)分析の、検出限界および特異性を改善できる。より具体的には、前駆体イオンからフラグメントイオンへの遷移を、複数の反応モニタリングモードでモニターする手法を取る。このアプローチにより、Wunschel ら(21)は *Bacillus anthracis* の孢子に関連した、寒天培地に存在するマーカーを分析するため、アルジトール酢酸を用いて2つの実証実験を行った。この実験では、孢子存在下で、寒天培地由来の3,6 アンヒドロ- $\alpha$ -1-ガラクトースを検知できた。熱分解-MS は、バクテリアの分類と同定を目的として、熱分解生成物のパターンを得るために使用されることが多い。熱分解は化学合成あるいは生化学合成による化合物が、熱により分解されていくプロセスである。脂質(26)やタンパク質(27)を含む多種の化合物を由来とした熱分解生成物質が、バクテリアの識別に用いられている。

## キャピラリー電気泳動-MS

キャピラリー電気泳動(CE) - MS は、他の分離技術と MS の組み合わせを補足、かつ/または取って代る多次元な分析アプローチで、幅広く用いられてきた(28)。ESI-MS と組み合わせた CE は自動化でき、小型化が可能で迅速に、かつ非常に効率的に複雑な試料を分離することが可能である。CE-MS は病原体からのバイオマーカー探索に、有用な技術である(28)。Hu ら(29)は CE-MS 分析により、タンパク質分解を行った細胞抽出液から特定のマーカーを選択し、そのマーカーのペプチド質量を MS/MS 分析でモニターするという手法によって、種特異的なタンパク質を同定した。彼らはデータベース探索によって、*Pseudomonas aeruginosa*, *S. aureus*, *Staphylococcus epidermidis* に関連するタ

ンパク質由来のペプチドを見出し、異種のバクテリアの混合液から特定のバクテリアを識別するマーカー・イオンとして、これらのペプチドを選別した。この手法は後に、選択的熱分解性ペプチド分析法(SPA)と命名された。SPA 法はバクテリアの混合物をスパイキングした、唾液サンプル中からの病原体同定にも用いられている。この手法では、検体中の相対存在量で1%しかないバクテリアも、高い信頼度で同定することができる。そのうえ、全体のタンパク質断片でなく、特定のマーカーのみを選択的に分析することにより、データ分析の成功率がはるかに改善された。彼らは、CE-MS 分析と、経験的なスコアリング機能を備えたデータベース探索アルゴリズムによるバクテリアの種の同定法についても報告している(30)。

## LC-MS

タンパク質、ペプチド、核酸および代謝産物のような生体サンプルの分離と分析には、現在、液体クロマトグラフィーに MS を接続したシステム、あるいはそれぞれを接続せずに使用するシステムが、現在最も広く使用されている。この分析法は、クロマトグラフィーの分離能力と、多種類の分離カラムを利用できるという柔軟性から、恐らく臨床応用には最も適した分離法だと考えられる。LC-ESI-MS による大腸菌由来のタンパク質の検知における前処理効果が研究されている(31)。さらに、データベース検索アプローチを用いたバクテリアの同定時に、タンパク質のパターン変化がどのように影響するかについても調べられている。Lo ら(32)は、単一の MS 分析を用いた複数のバクテリア種の同定を目的として、LC 選択的熱分解性ペプチド分析法を用いた。この実験では、設定した時間内に選択したペプチドが溶出され、そのペプチドがデータベースから特定できた場合、対応するバクテリア種の同定が可能であった。この手法を用い、単一の LC 選択的熱分解性ペプチド分析法により、現在までに異種バクテリアの混合液から、8つの病原体を同定することが可能となっている(32)。

多元的な LC-MS 分析手法が、バクテリアのタンパク質の迅速的同定に用いられている。アフィニティー精製と多次元のタンパク同定技術を組み合わせることで、Krishnamurthy ら(33)は孢子形成 *B. anthracis* から特異性の高いタンパク質バイオマーカー(抗原タンパク質 EA1)の分離と、特性評価を報告している。

脂質のプロファイルパターンは培養条件に依存するものと思われるが、リン脂質がいくつかの微生物種の有用なバイオマーカーであることが分かっている(34)。リン脂質は、MS および MS/MS 分析時にインタクトな状態でイオン化すること可能である。バクテリア細胞中にある個々の脂肪酸は、マイナスイオンモードにより得られたイオンの(MS/MS)スペクトルから同定できる。ESI-MS および MS/MS により、リン脂質分析の検出限界が劇的に改善された(35)。バクテリオホパネポリオス(BHP)は広範囲の真正細菌によって生合成される膜脂質である。Talbot ら 36 は、バクテリア培養からの BHP マーカーについての LC-MS 分析法について詳細に報告している。

## SELDI-MS

SELDI-MS は MALDI-MS 分析前で、検出するターゲットタンパク質のプレート上での保持状態に依存する分析手法である。アフィニティークロマトグラフィー技術を使用し、タンパク質は化学的あるいは生化学的に修正されたプロテインチップの表面上に保持される。ターゲットとするタンパク質が、その特徴に基づいて設計されたアフィニティー表面で保持され、精製された後に分析される、というのが SELDI 技術の利点である(37)。

SELDI-MS を用いたタンパク質のプロファイリングを試みるアプローチは、*Francisella tularensis* の 4 つの近縁する亜種の表現型の識別に使用された(38)。この手法は、化学修飾された表面上での、ターゲットタンパク質の結合状態の違いに基づいている。プロテインチップの選択的アレイ表面がプロテオーム中のタンパク質群を保持したうえで、アレイ方面上で結合タンパク質を洗浄、脱塩処理を行えるという特徴を有していることから、バクテリアの溶解物あるいは他のタンパク質が混在する試料をそのまま直接分析することが可能であり、このため、前処理におけるサンプルロスを最小限に留める事ができる。Lancashire ら(39)は SELDI-MS を用い、過去に良く調べ上げられた *neisseria meningitidis* ナイセリア髄膜炎疾病群を用いて、バイオマーカー候補の同定を行うとともに、近縁種を区別するモデルを構築した。shah ら(40)は MALDI-MS と SELDI-MS を用いて、インタクトなヒトの病原体(*Fusobacterium nucleatum*、*Prevotella intermedia*、*Prevotella nigrescens*)から、バクテリアの種を識別するための、スペクトルプロフィールを得た。プロファイリング法の鍵となる課題の一つは、結果の再現性が得られるか否かである。スペクトルの再現性を得るためには、標準化された試料調製プロトコルが必須である。

## 核酸ベースの分析アプローチ

微生物同定の手法としては、表現型を決定するものと、遺伝子型を決定するものに二分できる。遺伝子型決定は、種内での遺伝子型の保存性と、異種間での遺伝子型の変異をベースとしている。一方、表現型による分析は生理学的あるいは生化学的特徴を評価するもので、特定の代謝経路や抗生物質耐性に関する情報も得ることができる可能性を持つ。従来の生化学的分析手法は、臨床検査室での中心的なアプローチであることは以前と変わらないが、核酸ベースでの分析手法の臨床応用は徐々に脚光を集めつつある。

病原体の同定を目的として PCR 反応産物の迅速な分析に、ESI-MS および MALDI-MS が利用されている。例えば、Mayr マイアら(41)は、PCR と LC-MS を組み合わせたバクテリアの同定を報告している；1,000~10,000 コピーに相当する *S. aureus* のゲノムをヒト血漿にスパイクし、ゲノム増幅後に MS 分析した結果、ヒト由来の生体物質が背景にある状態でも、特異的にターゲットを検出で

きた。さらに彼らは、臨床環境で一般的な 10 の異なるバクテリア種の 16S rRNA 遺伝子領域を増幅して得た DNA 断片が、ESI-MS ベースでの遺伝子型決定に適応可能であることを確認した。

種の中でのより正確な識別を行うために、PCR 反応後に RFLP 法を取り入れることで、16S rRNA 遺伝子断片の多型による、種の識別が可能である。16S rRNA 遺伝子断片は、PCR 反応産物を制限酵素処理することで得られる。制限酵素処理によって PCR 反応産物を断片化することは、イオン化と MS 分析にも好都合である。RFLP 法は MALDI-MS との組み合わせで、ヒト血清から B 型肝炎および C 型肝炎ウイルス(HBV および HCV)の同定にも用いられている(42)(43)。この方法では、血清の 1 ミリリットル当たり、わずか 100 のコピーの HBV 遺伝子あれば存在を確認できるとともに、サブタイピング可能である(43)。上記の報告はいずれも、PCR 反応により増幅された特定の遺伝子マーカーのサイズ決定を行うことで、微生物種を識別する。しかしながら、特定の遺伝子マーカーの長さの違いは限定的であるため、この手法を用いての正確な微生物種の同定には限界がある。von Wintzingerode ら(44)は、MALDI-MS による PCR 反応産物の塩基特異的分析を組み合わせることで、16S rRNA 遺伝子をベースにしたバクテリア同定法を開発した。dUTP 存在下で 16S rRNA 遺伝子を増幅した後に、ウラシル-DNA-グリコシラーゼによる酵素反応により、T の塩基部分で断片化が起こる。続いて MS 分析で各 DNA 断片の長さを特定することにより、DNA の断片化パターンを把握することができるため、培養された *Bordetella* 種に加え、培養されていないバクテリアについても正確な識別が可能であった。

MALDI-MS ベースでの DNA 分析の難しさから、いくつかの研究グループでは、DNA から転写されたより安定的な RNA を用いた分析を行っている。RNA promoter 領域を含むフォワードプライマーを用いて、16S rDNA 遺伝子の PCR 反応による増幅を行い、その後、T7 RNA ポリメラーゼによるインビトロ転写を行う。続いて RNA を RNAase T1 により G の塩基の位置で断片化し、MALDI-MS 分析する(45)。

一塩基多型 (SNP) はゲノム上の特定の塩基が変異したものであるが、SNP マーカーを病原体の同定に用いる試みも見られる。SNP のアレルを決定する手法は、数多く存在する。既に言及した RFLP 法によるアプローチに加えて、プライマー伸張法、オリゴヌクレオチド・ライゲーション法、およびハイブリダイゼーション法と、MS を組み合わせによるジェノタイピングが行われている (46)。Ilina ら(47)は、プライマー伸張法と MALDI-MS により、HCV 陽性血清および血漿からの HCV ウイルスのジェノタイピングを行った。彼らは 2 つの特異的な SNP によるジェノタイプ解析を行うため、3 つのオリゴヌクレオチドプライマーを設計した。プライマー伸張反応はジオキシヌクレオチド存在下で、熱安定性の DNA ポリメラーゼを用いて行なわれた；反応生成物は MALDI-MS により分析した。微生物種の多様性と新たに起こる突然変異発により、SNP をベースとする遺伝子型の分析には限界がある。しかしながら、配列特異的なクリベージ法によるジェノタイピングにより、塩基配列が既知の種だけでなく、配列が未知な種についても識別が可能である。

Triangulation identification for the genetic evaluation of risks (TIGER)は広範囲にわたる微生物検知のための、有望なアプローチである(48)。この方法では、PCR 反応産物の塩基組成を検出するために、高性能の ESI-MS を用いる。本法の基盤となるのは、微生物ゲノムに種を越えて、広く保存された保存領域をターゲットとする「インテリジェント PCR プライマー」の使用である。得られた 80~140 塩基の PCR 反応産物は、高解像度フーリエ変換イオンサイクロトロン共鳴、高スループットモードでのタイム・オブ・フライト MS により測定される。正確な質量測定により、複数のプライマーセットから得られた PCR 反応産物の塩基組成を求めることが可能である。この塩基組成情報をもとに、「三角測定」で病原体の同定が行われる。このアプローチは、バクテリア、ウィルス、菌類および原虫類の検知に、同様に適したものである。図 4 は、6 つの *Campylobacter jejuni* 株の tkt 遺伝子を鋳型として得られた PCR 反応産物の両鎖を、ESI-MS を用いて分析した結果得られた質量スペクトルである (49)。

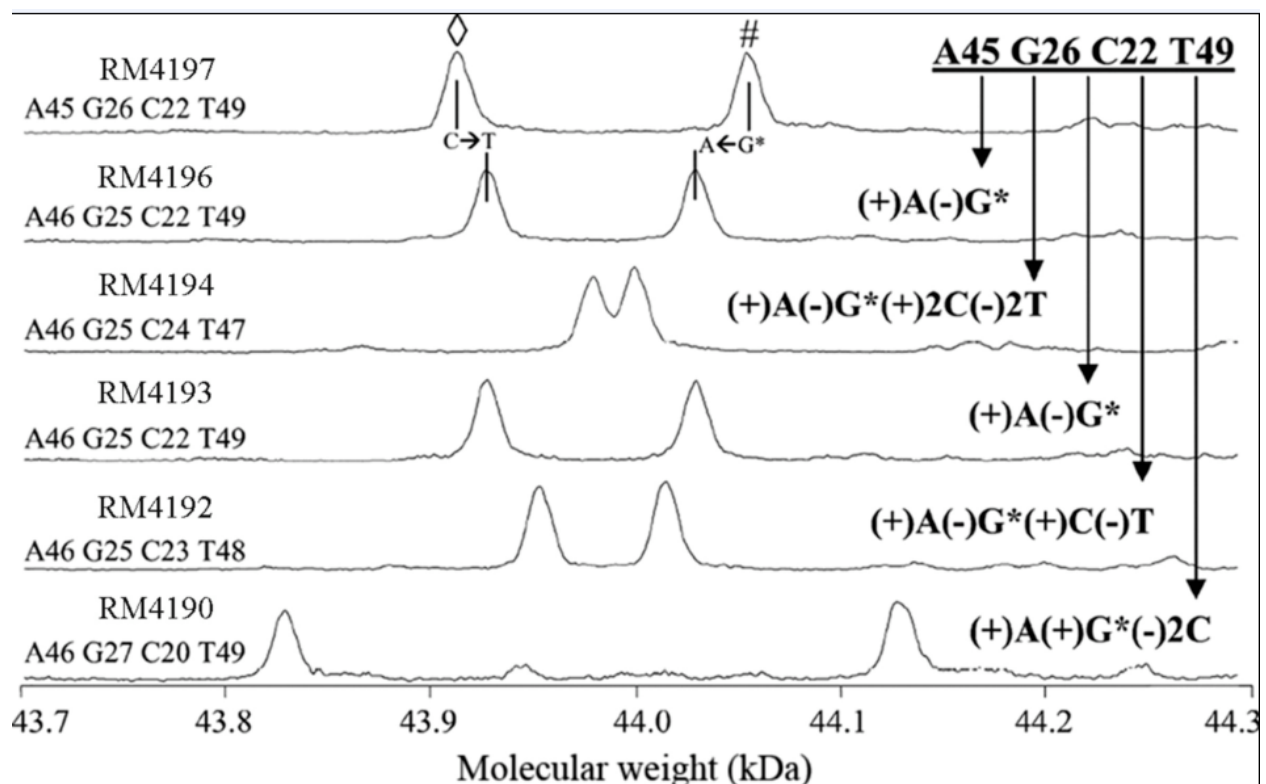

図 4 6 つの *Campylobacter jejuni* 株由来の tkt 遺伝子アンプリコンの両鎖を、ESI-MS を用いて分析した結果得られた質量スペクトル

それぞれの株からの PCR 反応産物のフォワード鎖 (◇)、リバース鎖 (#) を分析した。塩基組成はスペクトルの左側に示した。再版は Hannis らの承諾による；49c 2009 (American Society for Microbiology)。

同じアプローチが、呼吸器系病原体の迅速同定と株のタイピングに適用されている(50)。広範囲な株の 16S と 23S の DNA 遺伝子を増幅するために、高度に保存された領域の塩基配列をもとに、PCR プライマーが設計された。さらに、特定株のジェノタイピングを高解像度で決定するため、特定のバクテリアゲノムの可変領域をターゲットにしたプライマーも用いられた。重症急性呼吸器症候群(SARS)に関与するコロナウイルスを含む、異なる 9 つのコロナウイルス株から単離した 14 のウイルスの同定が TIGER 法によって行われ、検出限界はヒト血清の 1 ミリリットル辺り 1 PFU であった。

## データ分析方法

病原体を識別するためのデータ分析方法は、インタクトなタンパク質をプロファイリングする正攻法や、MS 分析データの複雑な統計解析法などがベースとなっている。水媒介性の病原体 *Aeromonas* のタンパク質のプロファイリングのために、MALDI-MS によるインタクトな全細胞の分析が行われた(51)。17 種の *Aeromonas* のマス分析シグネチャーのライブラリーが構築された；ライブラリー作りにはイオンの存在度は考慮に入れられず、質量のみが用いられた。このアプローチにはいくつかのアドバンテージがある：すなわちインタクトなバイオマーカー(例えばタンパク質)を検知する能力、単純な試料調製、および高スループットである。この手法が直面している課題はスペクトルの再現性である。再現性は培養条件および分析時のパラメーター設定により、大きく影響を受ける。

MS スペクトルデータの複雑さに伴い、微生物同定のための分析結果をリファレンスやバイオマーカーのスペクトルに適合させるための、多くの統計的アルゴリズムが開発されてきた。バイオマーカー選択的なアルゴリズムは、スペクトルから鍵となるシグナルを抽出するために使われている；混合されたバクテリアを同定するために、バイオマーカー・ライブラリーが用いられている (52)。同定のプロセスでは、試料のスペクトルとライブラリーのスペクトルを比較するために、有意性を判定する統計解析と、同様のアルゴリズムが用いられる。MALDI のスペクトラム・データベースには、100 ほどの属と 350 種のバクテリアのスペクトルがコンパイルされており、ヒトの感染症に関係するバクテリアの特性評価に用いられている(53)。なお、データベースに登録される種の数が増えるに従って、イオンシグナルが重なってしまう場合が増えるため、スペクトル中に、種特異的もしくは亜種特異的なマーカーを見出すのは容易ではない。

スペクトルデータの分類に最も多く使われる 2 つの数学的方法は、多変量解析(MVA)と人工ニューラルネットワーク(ANN)である。MVA は一度に 2 つ以上の統計変数(この場合  $m/z$ )についての観察および分析が行われたうえでの、多変数の統計に基づいている。主成分分析およびクラスター解析を含む多くの MVA 技術が、微生物の同定に用いられてきた。ANN は機械学習用のアルゴリズムである。この種の人工知能は、微生物の種を識別するバイオマーカーの同定に貢献する。

多変数の統計は、バクテリアサンプルの熱分解質量スペクトルを分析するために使用されることが多い。主成分分析(PCA)は、*B. anthracis*、*Yersinia pestis*、*Vibrio cholerae*、*Brucella melitensis*、および *F. tularensis* から得られた脂肪酸メチルエステルプロファイルのパターン認識に適用された(54)。PCA は最も一般的に使用される多変数のデータ分析ツールである。PCA は、もとにある変数(つまり質量スペクトル中の  $m/z$  値)の線形のコンビネーションである新しい変数(つまり基本コンポーネント)を形成するための技術である。基本コンポーネントは、スペクトル中の違いを見出す。Ilina ら (55) は、MALDI-MS を用いた 2 つのヒト病原体、*N. meningitidis* と *Neisseria gonorrhoeae* の直接的プロファイリングを報告した。クラスター分析によるグルーピングで、スペクトル間の類似点の測定により質量スペクトルをクラスター化した。この方法で、3 つのグループから集められた質量スペクトルをグルーピングしたところ、病原性および非病原性の *Neisseria* 分離株にうまく対応する形となった。タンパク質チップ技術である SELDI が、何千ものデータポイントを産生するため、バクテリア同定に有用なバイオマーカーを識別するためには、コンピューターアルゴリズムを使用しなければならない。Seibold ら(56)は、SELDI-MS とクラスター分析、PCA を組み合わせることで、複数の *F. tularensis* の亜種から単一株を識別した。SELDI-MS と組み合わせた ANN によって、*N. meningitidis* (39)や、*S. aureus* (57)の、同定が行われた。各々の  $m/z$  値での相対存在量が ANN モデルの入力層として使用された。出力層はターゲットとなるバクテリアのカテゴリーを表わすノードで構成された。この ANN モデルは、バクテリアのスペクトルを用いて、入出力層間での相関性が得られるようにトレーニングされ、さらにスペクトルの異なるトレーニングセットを使用して評価、検証された。

Demirev ら(58)は、微生物同定のために、MS とタンパク質データベース検索を組み合わせるアプローチを開発した。ここでは質量スペクトル中のタンパク質の質量と、プロテオームデータベース中のタンパク質の質量が比較された。それぞれの質量に、それに相当すると見られる生物がベストマッチとなるように宛がわれ(つまり最も一致したタンパク質を有した生物が宛がわれる)、論理的には、正しい微生物が結果として同定されることになる。このアプローチでは、観察された質量がデータベース中のタンパク質質量と一致する限り、スペクトルの再現性は必須ではない。タンパク質質量測定の精度限界を回避するために、ウイルスやバクテリア由来のペプチドシーケンスの情報も使われた(59)。シーケンス情報は、インタクトなタンパク質の断片化やタンパク質分解によるペプチドのフラグメントイオン(MS/MS)質量スペクトルの、プロテオームデータベースに対する探索により得られた。トップダウンのプロテオミクス方法論は、バイオマーカーの消化、分離および精製ステップが無くても、インタクトなタンパク質を同定できる。この方法論は、純粋な、あるいは混合バクテリアの種の分析ための、微生物プロテオミクスに利用された(60)(61)。実験的に得られたウイルスのトリプシン消化ペプチド質量(62)や、バクテリアのタンパク質質量(63)を用いて、微生物の同定が行われた。

着目した病原体のタンパク質データベースがある限り、タンパク質データ検索アルゴリズムを用いたデータ解析は、非常に正確で有用である。統計的手法を用いたスペクトルの分析は複雑である。さらに、スペクトルに再現性がない場合、同定結果は不正確なものになり得る。しかしながら、上述の通り、種または亜種の同定のために様々な統計的手法が用いられており、有用であることが示されている。PCA のアドバンテージは、クラスター分析よりもバイオマーカーのプロファイル間の違いを、より明らかにできることである。また ANN は、必要となるコンピューター時間が少ないことから、ハイスループット時に特に有用となる。

## 臨床応用

現在臨床研究で主流なのが、MS ベースの微生物の同定法である。これは検出限界が低濃度であること、普遍性を持つこと(選択性と特異性を備えながらも)、広いダイナミックレンジで定性および定量分析に利用可能であることによる。MS 分析の前の試料の精製および濃縮化を目的とした前処理には、細胞の培養が断然多く用いられる。機能的磁性粒子による病原体の濃縮は、臨床検体にはまだ適用されていないものの、生体試料にバクテリアをスパイキングした状態では、うまく行くことが分かっているため、近い将来には重要な役割を果たしていくはずである。膿、傷、唾液および尿サンプルから得られた臨床検体はすべて、選択的 CE-MS/MS により分析された(64)。バクテリアに特異的なマーカーペプチドの分析は、微生物の同定に優れた選択性と、高い信頼性を与えるものである。これらの臨床検体中のバクテリアは、純粋なコロニー単離無しに直接培養された試料を用いて、選択的 MS/MS 分析を行なった。P. aeruginosa、S. aureus、Streptococcus agalactiae を含む多くの病原体種(テーブル 1\*)が、同定されている。メチシリン耐性とメチシリン感受性の微生物株を、迅速で正確に区別する検査は、感染症患者の治療戦略の改善に結びつく可能性を持つ。Du ら(65)は、メチシリン感受性の S. aureus (MSSA)と methicillin-resistant S. aureus (MRSA)の識別を、MALDI-MS を用いて行った。MALDI-MS/MS および LC-MS/MS を用いた、S. aureus 株の比較プロテオミクス解析により、細胞壁を攻撃する抗生剤バンコマイシンに対する耐性度の違いが、65 のタンパク質の存在度の違いとともに示された (66)。

表 1 個々の臨床検体の選択的なタンパク質分解ペプチド分析により、同定された病原体[Du らの結果に基づく (64)]

**Table 1.** Identified pathogens by the selective proteotypic-peptide analysis of each clinical specimen [based on the results from Hu et al. (64)].

| Bacterium                               | Gram stain          | Specimen | Number of samples |
|-----------------------------------------|---------------------|----------|-------------------|
| <i>Enterococcus faecalis</i>            | Positive            | Pus      | 1                 |
| <i>Escherichia coli</i>                 | Negative            | Pus      | 2                 |
| <i>Escherichia coli</i>                 | Negative            | Urine    | 1                 |
| <i>Pseudomonas aeruginosa</i>           | Negative            | Sputum   | 5                 |
| <i>Salmonella</i> spp.                  | Negative            | Pus      | 1                 |
| <i>Staphylococcus aureus</i>            | Positive            | Sputum   | 6                 |
| <i>Staphylococcus epidermidis</i>       | Positive            | Wound    | 2                 |
| <i>Streptococcus agalactiae</i>         | Positive            | Wound    | 1                 |
| <i>Streptococcus agalactiae</i>         | Positive            | Pus      | 1                 |
| <i>Streptococcus agalactiae</i>         | Positive            | Urine    | 1                 |
| <i>Streptococcus pneumoniae</i>         | Positive            | Sputum   | 5                 |
| <i>Streptococcus pyogenes</i>           | Positive            | Pus      | 3                 |
| <i>S. aureus</i> + <i>P. aeruginosa</i> | Positive + negative | Pus      | 1                 |
| <i>E. coli</i> + <i>P. aeruginosa</i>   | Negative + negative | Urine    | 1                 |

嚢胞性繊維症患者から採取された新規の Taxon K 株を含む *Burkholderia cepacia* の複雑種の同定と識別を目的として、インタクトな細胞の MS 分析が行われた(67)。Carbonnelle ら(68)は、迅速な MALDI-MS をベースとした分析により、臨床微生物検査室から単離したインタクトな *staphylococci* の同定を報告した；彼らは、臨床的意義のある *micrococcaceae* ファミリーに属する、23 のバクテリアの種あるいは亜種を同定した。

リアルタイム PCR 法は感染症を特定するための、培養を伴わない最も主要な技術となっている (69)。PCR-MS は現在、リファレンスラボで運用されている；それは *Streptococcus*、*Hemophilus*、*Neisseria* による呼吸器感染の大流行についての疫学研究での、病原体の株をタイピングするための塩基組成決定に用いられてきた(50)。それらがすべてのペニシリン、セファロスポリンおよびアズトレオナムに対する抵抗性を持っているので、拡張スペクトル  $\beta$ -lactamases (ESBL)は、ペニシリン、セファロスポリン、アズトレオナムのすべてに耐性を示すため、 $\beta$ -lactamases の中でも最も臨床的に意義深いものである。Ikryannikova ら(70)は、*enterobacteriaceae* ファミリーの臨床株から、TEM タイプの ESBL を迅速に検知するため、MALDI-MS ベースのミニ配列決定法を採用した。Hujer ら(71)は、PCR アンプリコンを ESI-MS 分析することで、2 つのハウスキーピング遺伝子領域を調べることで、キノリン耐性遺伝子変異によってもたらされる、キノリン耐性を同定し得ることを実証した。その分析は *Acinetobacter* 種による感染症患者の、治療方針の意思決定に重要な情報を提供する。

## 結論と展望

検体に含まれる微生物を同定するツールには、核酸検出による分析法や核酸検出に拠らない分析法、およびインフォマティックスが含まれる。MS は検体中に含まれる微生物由来のバイオマーカーの同定に、有効な手法であることが示されてきた。しかしながら、解決しなければならない主要な課題の1つとして、複雑な検体から候補となるバイオマーカーを検知することが挙げられる。検体の複雑さに関連した問題を克服するために、前処理を行わない分析手法、あるいは広範囲に渡る生化学的分画・クロマトグラフィー分画を伴う分析方法が開発されつつある。MS ベースの、微生物の直接的な分析手法は、迅速性や分析操作の容易性を含む長所を有している。戦場や屋外環境における病原微生物の脅威を検知するためには、MALDI ベースの分析装置が、屋外に持ち出すことのできる質量分析計として最適である。通常微生物の分析には、シグナルノイズを回避するためにノイズを発生し得る物質が存在しない（あるいは除去されている）か、データ分析アルゴリズムが導入されている場合で無い限り微生物の純粋培養を行う。微生物的なバイオマーカーの複雑性は、様々なクロマトグラフィーベースの精製法(例えば HPLC や CE)を通じて単純化し得る；ある程度、識別能力は犠牲にしなければならないが、選択性、精度およびダイナミックレンジは本質的に改善される。

2001 年、米国で発生した炭疽菌事件以来、微生物の脅威への対策が注目されてきた。さらにそのうえ、コロナウイルスによって引き起こされた SARS や、新たなインフルエンザ A 型ウイルスによって引き起こされた H1N1 インフルエンザを含む、近年のいくつかの流行発生が引き金となり、より迅速で、感度ならびに精度が高く、リアルタイムな検出方法の開発が進められてきた。微生物細胞の検出限界の改良が、この数年の主要な課題である。この目標達成のためには、アフィニティー技術による細胞の濃縮化がますます重要なものとなる。PCR 法による核酸増幅と、MS を組み合わせた分析手法は、特に培養が可能でない微生物の分析用に、感度向上に向けたアプローチの一つになり得る。MALDI に加えて、脱離エレクトロスプレーイオン化(72)やリアルタイム直接分析法 (73)、ESI 支援レーザー脱離イオン化 (74) を含むいくつかの新しいイオン化技術は、リアルタイムで直接的な MS ベースでの病原体の分析手法に導入される大きな可能性を有している。更に、その他の MS 関連技術における進歩が、病原体同定のための強力なツールを生み出す可能性を持つ；これらの技術には高速・高解像液体クロマトグラフィー、イオン移動度スペクトロメトリー、高容量の線形イオントラップ、及びフーリエ変換イオンサイクロトロン共鳴型・フーリエ変換オービトラップ・飛行時間質量分析計のような、高解像質量分析装置が含まれる。このような方法論と装置の組み合わせにより、MS による病原体の分析能が向上していくのは間違いない。

## 謝 辞

**Author Contributions :** *All authors confirmed they have contributed to the intellectual content of this paper and have met the following 3 requirements : (a) significant contributions to the conception and design, acquisition of data, or analysis and interpretation of data ; (b) drafting or revising the article for intellectual content ; and (c) final approval of the published article.*

**Authors' Disclosures of Potential Conflicts of Interest :** *Upon manuscript submission, all authors completed the Disclosures of Potential Conflict of Interest form. Potential conflicts of interest :*

**Employment or Leadership :** None declared.

**Consultant or Advisory Role :** None declared.

**Stock Ownership :** None declared.

**Honoraria :** None declared.

**Research Funding :** National Science Council of the Republic of China.

**Expert Testimony :** None declared.

**Role of Sponsor :** The funding organizations played a direct role in the design of study, review and interpretation of data, and preparation or approval of manuscript.

**Acknowledgments :** We thank the National Science Council of the Republic of China for financially supporting part of the work mentioned in this review. We also thank Cheng-Tung Chen for acquiring the spectra shown in Fig. 3.

## 脚注

<sup>1</sup> Nonstandard abbreviations : MS, mass spectrometry ; ESI, electrospray ionization ; GC, gas chromatography ; LC, liquid chromatography ; NP, nanoparticle ; POA, pigeon ovalbumin ; DESI, desorption electrospray ionization ; MS/MS, tandem MS ; BAMS, bioaerosol mass spectrometry ; CE, capillary electrophoresis ; SPA, selective proteotypic-peptide analysis ; BHP, bacteriophanepolyol ; HBV, hepatitis B virus ; HCV, hepatitis C virus ; SNP, single nucleotide polymorphism ; TIGER, triangulation identification for the genetic evaluation of risks ; SARS, severe acute respiratory syndrome ; MVA, multivariate analysis ; ANN, artificial neural network ; PCA, principal component analysis ; MSSA, methicillin-susceptible *S. aureus* ; MRSA, methicillin-resistant *S. aureus* ; ESBL, extended-spectrum  $\beta$ -lactamase.

## References

1. Demirev PA, Fenselau C. Mass spectrometry for rapid characterization of microorganisms. *Annu Rev Anal Chem* 2008 ; 1 : 3.1-3.23.
2. Gu H, Ho P-L, Tsang KWT, Wang L, Xu B. Using biofunctional magnetic nanoparticles to capture vancomycin-resistant *Enterococci* and other gram-positive bacteria at ultralow concentration. *J Am Chem Soc* 2003 ; 125 : 15702-15703.
3. Liu JC, Tsai PJ, Lee YC, Chen YC. Affinity capture of uropathogenic *Escherichia coli* using pigeon ovalbumin-bound  $\text{Fe}_3\text{O}_4@ \text{Al}_2\text{O}_3$  magnetic nanoparticles. *Anal Chem* 2008 ; 80 : 5425-5432.

4. Sampath R, Russell KL, Massire C, Eshoo MW, Harpin V, Blyn LB, et al. Global surveillance of emerging influenza virus genotypes by mass spectrometry. *PLoS ONE* 2007 ; 2 : e489.
5. Afonso C, Fenselau C. Use of bioactive glass slides for matrix-assisted laser desorption/ionization analysis : application to microorganisms. *Anal Chem* 2003 ; 75 : 694-697.
6. Madonna AJ, Van Cuyk S, Voorhees KJ. Detection of *Escherichia coli* using immunomagnetic separation and bacteriophage amplification coupled with matrix-assisted laser desorption/ionization time-of-flight mass spectrometry. *Rapid Commun Mass Spectrom* 2003 ; 17 : 257-263.
7. Lin C-C, Yeh Y-C, Yang C-Y, Chen C-L, Chen G-F, Chen C-C, Wu Y-C. Selective binding of mannose-encapsulated gold nanoparticles to type 1 pili in *Escherichia coli*. *JACS* 2002 ; 124 : 3508-3509.
8. Gu HW, Ho PL, Tsang KWT, Yu CW, Xu B. Using biofunctional magnetic nanoparticles to capture Gram-negative bacteria at an ultra-low concentration. *Chem Commun* 2003 ; : 1966-1967.
9. Lin YS, Tsai PJ, Weng MF, Chen YC. Affinity capture using vancomycin-bound magnetic nanoparticles for the MALDI-MS analysis of bacteria. *Anal Chem* 2005 ; 77 : 1753-1760.
10. Seng P, Drancourt M, Gouriet F, La Scola B, Fournier PE, Rolain JM, Raoult D. Ongoing revolution in bacteriology : routine identification of bacteria by matrix-assisted laser desorption ionization time-of-flight mass spectrometry. *Clin Infect Dis* 2009 ; 49 : 543-551.
11. van Baar BLM. Characterisation of bacteria by matrix-assisted laser desorption/ionisation and electrospray mass spectrometry. *FEMS Microbiol Rev* 2000 ; 24 : 193-219.
12. Fenselau C, Demirev PA. Characterization of intact microorganisms by MALDI mass spectrometry. *Mass Spectrom Rev* 2001 ; 20 : 157-171.

13. Lay JO. MALDI-TOF mass spectrometry of bacteria. *Mass Spectrom Rev* 2001 ; 20 : 172-194.
14. Demirev PA, Fenselau C. Mass spectrometry in biodefense. *J Mass Spectrom* 2008 ; 43 : 1441-1457.
15. Xiang F, Anderson GA, Veenstra TD, Lipton MS, Smith RD. Characterization of microorganisms and biomarker development from global ESI-MS/MS analyses of cell lysates. *Anal Chem* 2000 ; 72 : 2475-2481.
16. Vaidyanathan S, Kell DB, Goodacre R. Flow-injection electrospray ionization mass spectrometry of crude cell extracts for high-throughput bacterial identification. *J Am Soc Mass Spectrom* 2002 ; 13 : 118-128.
17. Song Y, Talaty N, Datsenko K, Wanner BL, Cooks RG. In vivo recognition of *Bacillus subtilis* by desorption electrospray ionization mass spectrometry (DESI-MS). *Analyst* 2009 ; 134 : 838-841.
18. Fergenson DP, Pitesky ME, Tobias HJ, Steele PT, Czerwieniec GA, Russell SC, et al. Reagentless detection and classification of individual bioaerosol particles in seconds. *Anal Chem* 2004 ; 76 : 373-378.
19. Tobias HJ, Schafer MP, Pitesky M, Fergenson DP, Horn J, Frank M, Gard EE. Bioaerosol mass spectrometry for rapid detection of individual airborne *Mycobacterium tuberculosis* H37Ra particles. *Appl Environ Microbiol* 2005 ; 71 : 6086-6095.
20. van Wuijckhuijse AL, Stowers MA, Kleefsman WA, van Baar BLM, Kientz CE, Marijnissen JCM. Matrix-assisted laser desorption/ionisation aerosol time-of-flight mass spectrometry for the analysis of bioaerosols : development of a fast detector for airborne biological pathogens. *J Aerosol Sci* 2005 ; 36 : 677-687.
21. Wunschel DS, Colburn HA, Fox A, Fox KF, Harley WM, Wahl JH, Wahl KL. Detection of agar, by analysis of sugar markers, associated with *Bacillus anthracis* spores, after culture. *J Microbiol Methods* 2008 ; 74 : 57-63.
22. Ishida Y, Kitagawa K, Nakayama A, Ohtani H. Complementary analysis of lipids in whole bacteria cells by thermally assisted hydrolysis and methylation-GC and MALDI-

MS combined with on-probe sample pretreatment. J Anal Appl Pyrolysis 2006 ; 77 : 116-120.

23. Mas S, Villas-Boas SG, Hansen ME, Akesson M, Nielsen J. A comparison of direct infusion MS and GC-MS for metabolic footprinting of yeast mutants. Biotechnol Bioeng 2007 ; 96 : 1014-1022.
24. Smilde AK, van der Werf MJ, Bijlsma S, van der Werff-van der Vat BJC, Jellema RH. Fusion of mass spectrometry-based metabolomics data. Anal Chem 2005 ; 77 : 6729-6736.
25. van der Werf MJ, Overkamp KM, Muilwijk B, Coulter L, Hankemeier T. Microbial metabolomics : toward a platform with full metabolome coverage. Anal Biochem 2007 ; 370 : 17-25.
26. Voorhees KJ, Miletova P, Abbas-Hawks C, Hadfield TL. Identification of lipid-based biomarkers in the high-resolution pyrolysis/mass spectrum of *Brucella neotomae*. J Anal Appl Pyrolysis 2006 ; 75 : 33-42.
27. Voorhees KJ, Abbas-Hawks C, Miletova P. Identification of protein biomarkers in the pyrolysis electron ionization high-resolution mass spectrum of *Brucella neotomae*. J Anal Appl Pyrolysis 2006 ; 75 : 90-96.
28. Kolch W, Neuss C, Peizing M, Mischak H. Capillary electrophoresis-mass spectrometry as a powerful tool in clinical diagnosis and biomarker discovery. Mass Spectrom Rev 2005 ; 24 : 959-977.
29. Hu A, Tsai PJ, Ho YP. Identification of microbial mixtures by capillary electrophoresis/selective tandem mass spectrometry. Anal Chem 2005 ; 77 : 1488-1495.
30. Hu A, Lo AAL, Chen CT, Lin KC, Ho YP. Identifying bacterial species using CE-MS and SEQUEST with an empirical scoring function. Electrophoresis 2007 ; 28 : 1387-1392.
31. Ho YP, Hsu PH. Investigating the effects of protein patterns on microorganism identification by high-performance liquid chromatography-mass spectrometry and protein database searches. J Chromatogr A 2002 ; 976 : 103-111.

32. Lo AAL, Hu A, Ho YP. Identification of microbial mixtures by LC-selective proteotypic-peptide analysis (SPA). *J Mass Spectrom* 2006 ; 41 : 1049-1060.
33. Krishnamurthy T, Hewel J, Bonzagni NJ, Dabbs J, Bull RL, Yates JR. Simultaneous identification and verification of *Bacillus anthracis*. *Rapid Commun Mass Spectrom* 2006 ; 20 : 2053-2056.
34. Zhang CL, Huang ZY, Li YL, Romanek CS, Mills GL, Gibson RA, et al. Lipid biomarkers, carbon isotopes, and phylogenetic characterization of bacteria in California and Nevada hot springs. *Geomicrobiol J* 2007 ; 24 : 519-534.
35. Moe MK, Anderssen T, Strøm MB, Jensen E. Total structure characterization of unsaturated acidic phospholipids provided by vicinal di-hydroxylation of fatty acid double bonds and negative electrospray ionization mass spectrometry. *J Am Soc Mass Spectrom* 2005 ; 16 : 46-59.
36. Talbot HM, Rohmer M, Farrimond P. Rapid structural elucidation of composite bacterial hopanoids by atmospheric pressure chemical ionisation liquid chromatography/ion trap mass spectrometry. *Rapid Commun Mass Spectrom* 2007 ; 21 : 880-892.
37. Thulasiraman V, McCutchen-Maloney SL, Motin VL, Garcia E. Detection and identification of virulence factors in *Yersinia pestis* using SELDI ProteinChip system. *BioTechniques* 2000 ; 30 : 428-432.
38. Lundquist M, Caspersen MB, Wikström P, Forsman M. Discrimination of *Francisella tularensis* subspecies using surface enhanced laser desorption ionization mass spectrometry and multivariate data analysis. *FEMS Microbiol Lett* 2005 ; 243 : 303-310.
39. Lancashire L, Schmid O, Shah H, Ball G. Classification of bacterial species from proteomic data using combinatorial approaches incorporating artificial neural networks, cluster analysis and principal components analysis. *Bioinformatics* 2005 ; 21 : 2191-2199.
40. Shah HN, Keys CJ, Schmid O, Gharbia SE. Matrix-assisted laser desorption/ionization time-of-flight mass spectrometry and proteomics : a new era in anaerobic microbiology. *Clin Infect Dis* 2002 ; 35 : S58-S64.

41. Mayr BM, Kobold U, Moczko M, Nyeki A, Koch T, Huber CG. Identification of bacteria by polymerase chain reaction followed by liquid chromatography-mass spectrometry. *Anal Chem* 2005 ; 77 : 4563-4570.
42. Oh HB, Kim SO, Cha CH, Hong SP, Folk WR, Kim KM, Suh DJ. Identification of hepatitis C virus genotype 6 in Korean patients by analysis of 5' untranslated region using a matrix assisted laser desorption/ionization time of flight-based assay, Restriction Fragment Mass Polymorphism. *J Med Virol* 2008 ; 80 : 1712-1719.
43. Hong SP, Kim NK, Hwang SG, Chung HJ, Kim S, Han JH, et al. Detection of hepatitis B virus YMDD variants using mass spectrometric analysis of oligonucleotide fragments. *J Hepatol* 2004 ; 40 : 837-844.
44. von Wintzingerode F, Bocker S, Schlotelburg C, Chiu NHL, Storm N, Jurinke C, et al. Base-specific fragmentation of amplified 16S rRNA genes analyzed by mass spectrometry : a tool for rapid bacterial identification. *Proc Natl Acad Sci U S A* 2002 ; 99 : 7039-7044.
45. Lefmann M, Honisch C, Bocker S, Storm N, von Wintzingerode F, Schlotelburg C, et al. Novel mass spectrometry-based tool for genotypic identification of mycobacteria. *J Clin Microbiol* 2004 ; 42 : 339-346.
46. Tost J, Gut VG. Genotyping single nucleotide polymorphisms by mass spectrometry. 2002 ; 21 : 388-418.
47. Ilina EN, Malakhova MV, Generozov EV, Nikolaev EN, Govorun VM. Matrix-assisted laser desorption ionization-time of flight (mass spectrometry) for hepatitis C virus genotyping. *J Clin Microbiol* 2005 ; 43 : 2810-2815. [\[](#)
48. Ecker DJ, Sampath R, Massire C, Blyn LB, Hall TA, Eshoo MW, Hofstadler SA. Innovation-Ibis T5000 : a universal biosensor approach for microbiology. *Nat Rev Microbiol* 2008 ; 6 : 553-558.
49. Hannis JC, Manalili SM, Hall TA, Ranken R, White N, Sampath R, et al. High-resolution genotyping of *Campylobacter* species by use of PCR and high-throughput mass spectrometry. *J Clin Microbiol* 2008 ; 46 : 1220-1225.

50. Ecker DJ, Sampath R, Blyn LB, Eshoo MW, Ivy C, Ecker JA, et al. Rapid identification and strain-typing of respiratory pathogens for epidemic surveillance. *Proc Natl Acad Sci U S A* 2005 ; 102 : 8012-8017.
51. Donohue MJ, Smallwood AW, Pfaller S, Rodgers M, Shoemaker JA. The development of a matrix-assisted laser desorption/ionization mass spectrometry-based method for the protein fingerprinting and identification of *Aeromonas* species using whole cells. *J Microbiol Methods* 2006 ; 65 : 380-389.
52. Wahl KL, Wunschel SC, Jarman KH, Valentine NB, Petersen CE, Kingsley MT, et al. Analysis of microbial mixtures by matrix-assisted laser desorption/ionization time-of-flight mass spectrometry. *Anal Chem* 2002 ; 74 : 6191-6199.
53. Keys CJ, Dare DJ, Sutton H, Wells G, Lunt M, McKenna T, et al. Compilation of a MALDI-TOF mass spectral database for the rapid screening and characterisation of bacteria implicated in human infectious diseases. *Infect Genet Evol* 2004 ; 4 : 221-242.
54. Xu M, Voorhees KJ, Hadfield TL. Repeatability and pattern recognition of bacterial fatty acid profiles generated by direct mass spectrometric analysis of in situ thermal hydrolysis/methylation of whole cells. *Talanta* 2003 ; 59 : 577-589.
55. Ilina EN, Borovskaya AD, Malakhova MM, Vereshchagin VA, Kubanova AA, Kruglov AN, et al. Direct bacterial profiling by matrix-assisted laser desorption-ionization time-of-flight mass spectrometry for identification of pathogenic *Neisseria*. *J Mol Diagn* 2009 ; 11 : 75-86.
56. Seibold E, Bogumil R, Vorderwulbecke S, Al Dahouk S, Buckendahl A, Tomaso H, Splettstoesser W. Optimized application of surface-enhanced laser desorption/ionization time-of-flight MS to differentiate *Francisella tularensis* at the level of subspecies and individual strains. *FEMS Immunol Med Microbiol* 2007 ; 49 : 364-373.
57. Yang YC, Yu H, Xiao DW, Liu H, Hu Q, Huang B, et al. Rapid identification of *Staphylococcus aureus* by surface enhanced laser desorption and ionization time of flight mass spectrometry. *J Microbiol Methods* 2009 ; 77 : 202-206.
58. Demirev PA, Ho YP, Ryzhov V, Fenselau C. Microorganism identification by mass spectrometry and protein database searches. *Anal Chem* 1999 ; 71 : 2732-2738.

59. Warscheid B, Jackson K, Sutton C, Fenselau C. MALDI analysis of *Bacilli* in spore mixtures by applying a quadrupole ion trap time-of-flight tandem mass spectrometer. *Anal Chem* 2003 ; 75 : 5608-5617.
60. Demirev PA, Feldman AB, Kowalski P, Lin JS. Top-down proteomics for rapid identification of intact microorganisms. *Anal Chem* 2005 ; 77 : 7455-7461.
61. Wynne C, Fenselau C, Demirev PA, Edwards N. Top-down identification of protein biomarkers in bacteria with unsequenced genomes. *Anal Chem* 2009 ; 81 : 9633-9642.
62. Yao Z-P, Demirev PA, Fenselau C. Mass spectrometry-based proteolytic mapping for rapid virus identification. *Anal Chem* 2002 ; 74 : 2529-2534.
63. Tao L, Yu X, Snyder AP, Li L. Bacterial identification by protein mass mapping combined with an experimentally derived protein mass database. *Anal Chem* 2004 ; 76 : 6609-6617.
64. Hu A, Chen CT, Tsai PJ, Ho YP. Using capillary electrophoresis-selective tandem mass spectrometry to identify pathogens in clinical samples. *Anal Chem* 2006 ; 78 : 5124-5133.
65. Du Z, Yang R, Guo Z, Song Y, Wang J. Identification of *Staphylococcus aureus* and determination of its methicillin resistance by matrix-assisted laser desorption/ionization time-of-flight mass spectrometry. *Anal Chem* 2002 ; 74 : 5487-5491.
66. Pieper R, Gatlin-Bunai CL, Mongodin EF, Parmar PP, Huang ST, Clark DJ, et al. Comparative proteomic analysis of *Staphylococcus aureus* strains with differences in resistance to the cell wall-targeting antibiotic vancomycin. *Proteomics* 2006 ; 6 : 4246-4258.
67. Degand N, Carbonnelle E, Dauphin B, Beretti JL, Le Bourgeois M, Sermet-Gaudelus I, et al. Matrix-assisted laser desorption ionization-time of flight mass spectrometry for identification of nonfermenting gram-negative bacilli isolated from cystic fibrosis patients. *J Clin Microbiol* 2008 ; 46 : 3361-3367.
68. Carbonnelle E, Beretti J-L, Cottyn S, Quesne G, Berche P, Nassif X, Ferroni A. Rapid identification of *Staphylococci* isolated in clinical microbiology laboratories by matrix-

assisted laser desorption ionization-time of flight mass spectrometry. J Clin Microbiol 2007 ; 45 : 2156-2161.

69. Fox A. Mass spectrometry for species or strain identification after culture or without culture : past, present, and future. J Clin Microbiol 2006 ; 44 : 2677-2680.
70. Ikryannikova LN, Shitikov EA, Zhivankova DG, Il'ina EN, Edelstein MV, Govorun VM. A MALDI TOF MS-based minisequencing method for rapid detection of TEM-type extended-spectrum beta-lactamases in clinical strains of *Enterobacteriaceae*. J Microbiol Methods 2008 ; 75 : 385-391.
71. Hujer KM, Hujer AM, Endimiani A, Thomson JM, Adams MD, Goglin K, et al. Rapid determination of quinolone resistance in *Acinetobacter* spp. J Clin Microbiol 2009 ; 47 : 1436-1442.
72. Takats Z, Wiseman JM, Gologan B, Cooks RG. Mass spectrometry sampling under ambient conditions with desorption electrospray ionization. Science (Wash DC) 2004 ; 306 : 471-473.
73. Cody RB, Laramée JA, Durst HD. Versatile new ion source for the analysis of materials in open air under ambient conditions. Anal Chem 2005 ; 77 : 2297-2302.
74. Shiea J, Huang MZ, Hsu HJ, Lee CY, Yuan CH, Beech I, Sunner J. Electrospray-assisted laser desorption/ionization mass spectrometry for direct ambient analysis of solids. Rapid Commun Mass Spectrom 2005 ; 19 : 3701-3704.
